# Supplementary figures and images for: Barriers to Medication Review Process Implementation—Cross-Sectional Study among Community Pharmacists in Jordan
Source: MDPI journal article supplement (doi:10.3390/healthcare10040651), 2022-03-31

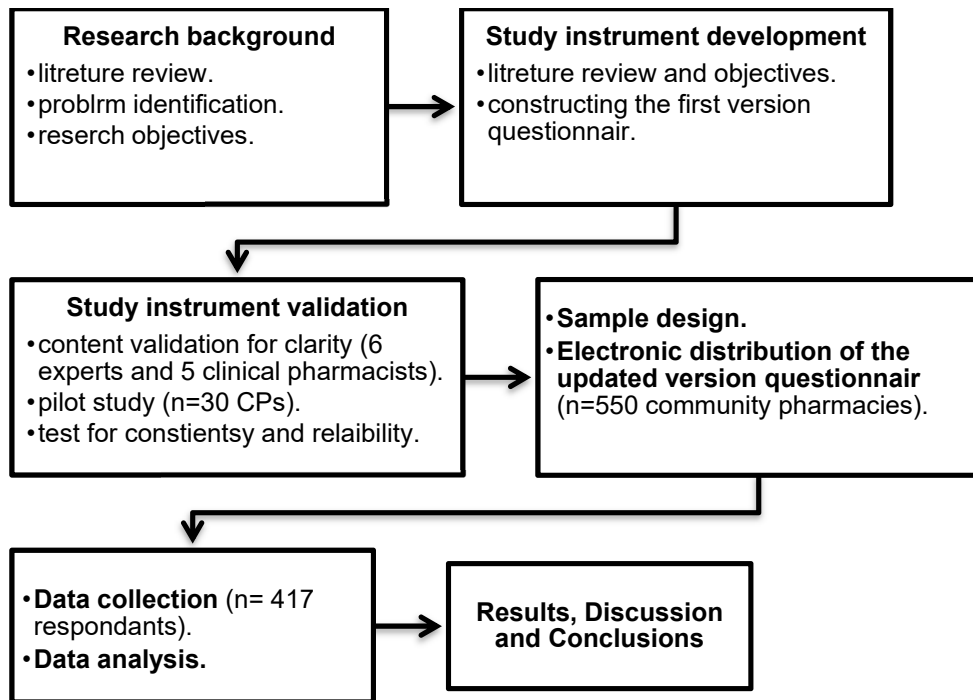

**Figure S1.** Flow chart of the whole study process. Abbreviations: CPs, Community Pharmacists

Supplement: s1 [file s1]
